# Supplementary material for: Exploring the potential of introducing an electronic death registration system in South Africa
Source: Research Square preprint supplement (doi:10.21203/rs.3.rs-4396960/v1), 2024-06-21
Supplement: Supplementary file 1 [file ced7a9b2b34011ccb63fe4db.docx]

Table 2: Overview of the quantitative and qualitative findings from the study, The potential of an electronic death registration system in South Africa: A feasibility and acceptability study (July – November 2022)

| **Emerging Themes** | **Questionnaire answers** | | | **Interview perceptions and quotes** |
| --- | --- | --- | --- | --- |
| **Survey (N=208)** | **Online workshop questionnaire (N varies by question)** | |
| **Importance of Cause of Death data** | 80.8% (168/208) indicated mortality statistics were very important, giving a rating of 5/5, 16.8% (35/208) gave a 4/5 rating for the importance of mortality statistics and <3.0% gave a rating of 3/5 or less  82.1% (69/84) of doctors and 75.7% (28/37) of  nurses gave a rating of 5/5 for  importance of mortality statistics, 16.7% (14/84) of doctors and 18.9% (7/37) of nurses gave a rating of 4/5, 1.2% (1/84) of doctors and 5.4% (2/37) of nurses gave a rating of 3/5 or less. | When asked "How could these data (mortality data) help with public health planning and monitoring (N=171)?" - 38.6% (66/171) of responses indicated mortality statistics  are useful for health planning,  prevention and interventions - 24.0% (41/171) of responses indicated that it was important to determine resource allocation - 14.6% (25/171) responses indicated it could be used to identify disease priorities  - 8.2%(14/171) health policy development  -8.2% (14/171) public health surveillance  6.4% (11/171) identification of areas of training | | “Death statistics are one of the only pure sources of data in terms of understanding what's happening in the community… to identify (health) needs.” ID6, female, health facility manager.  “Critically important … if we had better and more complete recording on cause of death data, I think it would be really useful to really understand the burden of disease in South Africa and mortality and to do more nuanced analysis around population groups" ID2, female, public health specialist.  "Important, especially when it comes to funeral insurance. Most funeral directors have funeral insurance packages, so the mortality statistics are used there....it also helps control and manage your business better." ID12, male, funeral director. |
| **Perceived quality of cause of death data** | 46.2% (96/208) participants gave a rating of 3/5 for the quality of the current COD1data (average), 29.3% (61/208) of participants gave a rating of 2 or less with 12.5% (26/208)) of participants giving a rating of 5/5 (good quality)  Among providers, 52.4% (44/84) of doctors and  48.6% (18/37) of nurses gave a rating  of 3/5 for the quality of current COD data. A much higher  percentage of nurses gave a  rating of 5/5 compared to  doctors (32.4% (12/37) of nurse’s versus  2.4% (2/84) of doctors) | When asked "Why would you be concerned with the high proportion of ill-defined causes in a mortality data set?"(N=85)  Respondents reported: - 72.8% (62/85) stated “it would bias the data and affect its usefulness for planning.”  -15.3% (13/85) stated “it shows the lack of training of medical certifiers and a lack of understanding of the importance of the data.”  - 11.8% (10/85) had other concerns | | "Probably quite bad, particularly for people that die at home, you don't necessarily know what they die of. For people who die in-hospital ... that is fairly reliable information, so it depends on where you are." ***ID9, female, medical doctor.***  "High percentage of unknown causes, which leads to poor  quality data" ***ID10, female, medical officer.***  "Not accurate, take an example, during covid, there were a lot of covid deaths, … we had families that insisted that (covid) should not go on the death notification. It distorted the figures." ***ID12, male, funeral director.*** |
| **Drivers behind the quality of death data** |  | When asked how the cause of death data could be made fit for purpose (N=115): - 43.5% (50/115) indicated "improve training in MCCD2 and ICD-103 coding" - 20.9% (24/115) suggested “introducing an online, centralised system" - 12.3%( 14/115) said "improve data capture accuracy" - 7.0% (8/115) said "timely release of the data" - 7.0% (8/115 said "improved access to the data"   - 4.3% (5/115) said “integrate mortality with other systems eg, Justice.” - 2.6% (3/115) Audit MCC / M&M meetings - 1.7% (2/115) Review / update MCCD form - 0.9% (1/115) System design should be simple | "Junior doctors don't understand that the form is for statistical purposes, they think the form is just for legal purposes....when they fill in the form....they want to tell the whole story...so they don't get sued." ***ID6, female, medical director.***    "There are a lot of deaths at home … so there are a lot of deaths notified where it's mostly guesswork and I don't think there's a lot we can do about that" ***ID10, female, medical officer.***  "Resources, obviously, most of our people don't have a regular physician that they attend … stigma as well. Certain diseases people don't want to be associated with." ***ID12, male, funeral director.***  “The focus must be on the quality of the data that's submitted and that really does require having the right system, the right tool and the right training of healthcare providers to submit their data." ***ID2, female, public health specialist.*** | |
| **Acceptability of an EDRS4** | “Would you use an electronic system?” - 144/208 (69.2%) responded "Yes" - 45/208 (21.6%) responded "Maybe" - 19/208 (9.1%) responded “No” | When asked to identify the barriers to  implementing an online system (N=158): - 43.0% (68/158) said “poor internet access.” - 19.6% (31/158) said “poor connectivity due to power outages.” - 9.5% (15/158) felt poor computer literacy would be an issue. - 8.9% (14/158) felt that poor funding, resulting in staff limitations would be a problem.  -6.3% (10/158) Corruption / theft: cables devices funding  -5.1% (8/158) Integration of data from different sources/organisations  ->10.0% (12/158) Other barriers | "It will stop papers from getting lost" ***ID10, female, medical officer.***  "It will get the data to Stats SA5 quicker than the paper copy and maybe that will decrease the time lag of the publication of data " ***ID10, female, medical officer.***  "It would make our lives so much easier…removing the person (at Home affairs) behind the computer…" ***ID11, male, funeral director.***  "I think it is possible to have an online system … that will give you immediate analytics and summaries which would be very powerful data, for action" ***ID2, female, public health specialist.*** | |

1. *COD= Cause of Death*
2. *MCCD= Medical Certificate of Cause of Death*
3. *ICD-10= International Classification of Diseases 10th revision*
4. *EDRS= Electronic Death Registration System*
5. *Stats SA= Statistics South Africa*
